# Supplementary material for: Hallmarks of peripheral nerve function in bone regeneration
Source: Springer Nature journal article supplement (doi:10.1038/s41413-022-00240-x), 2023-01-05

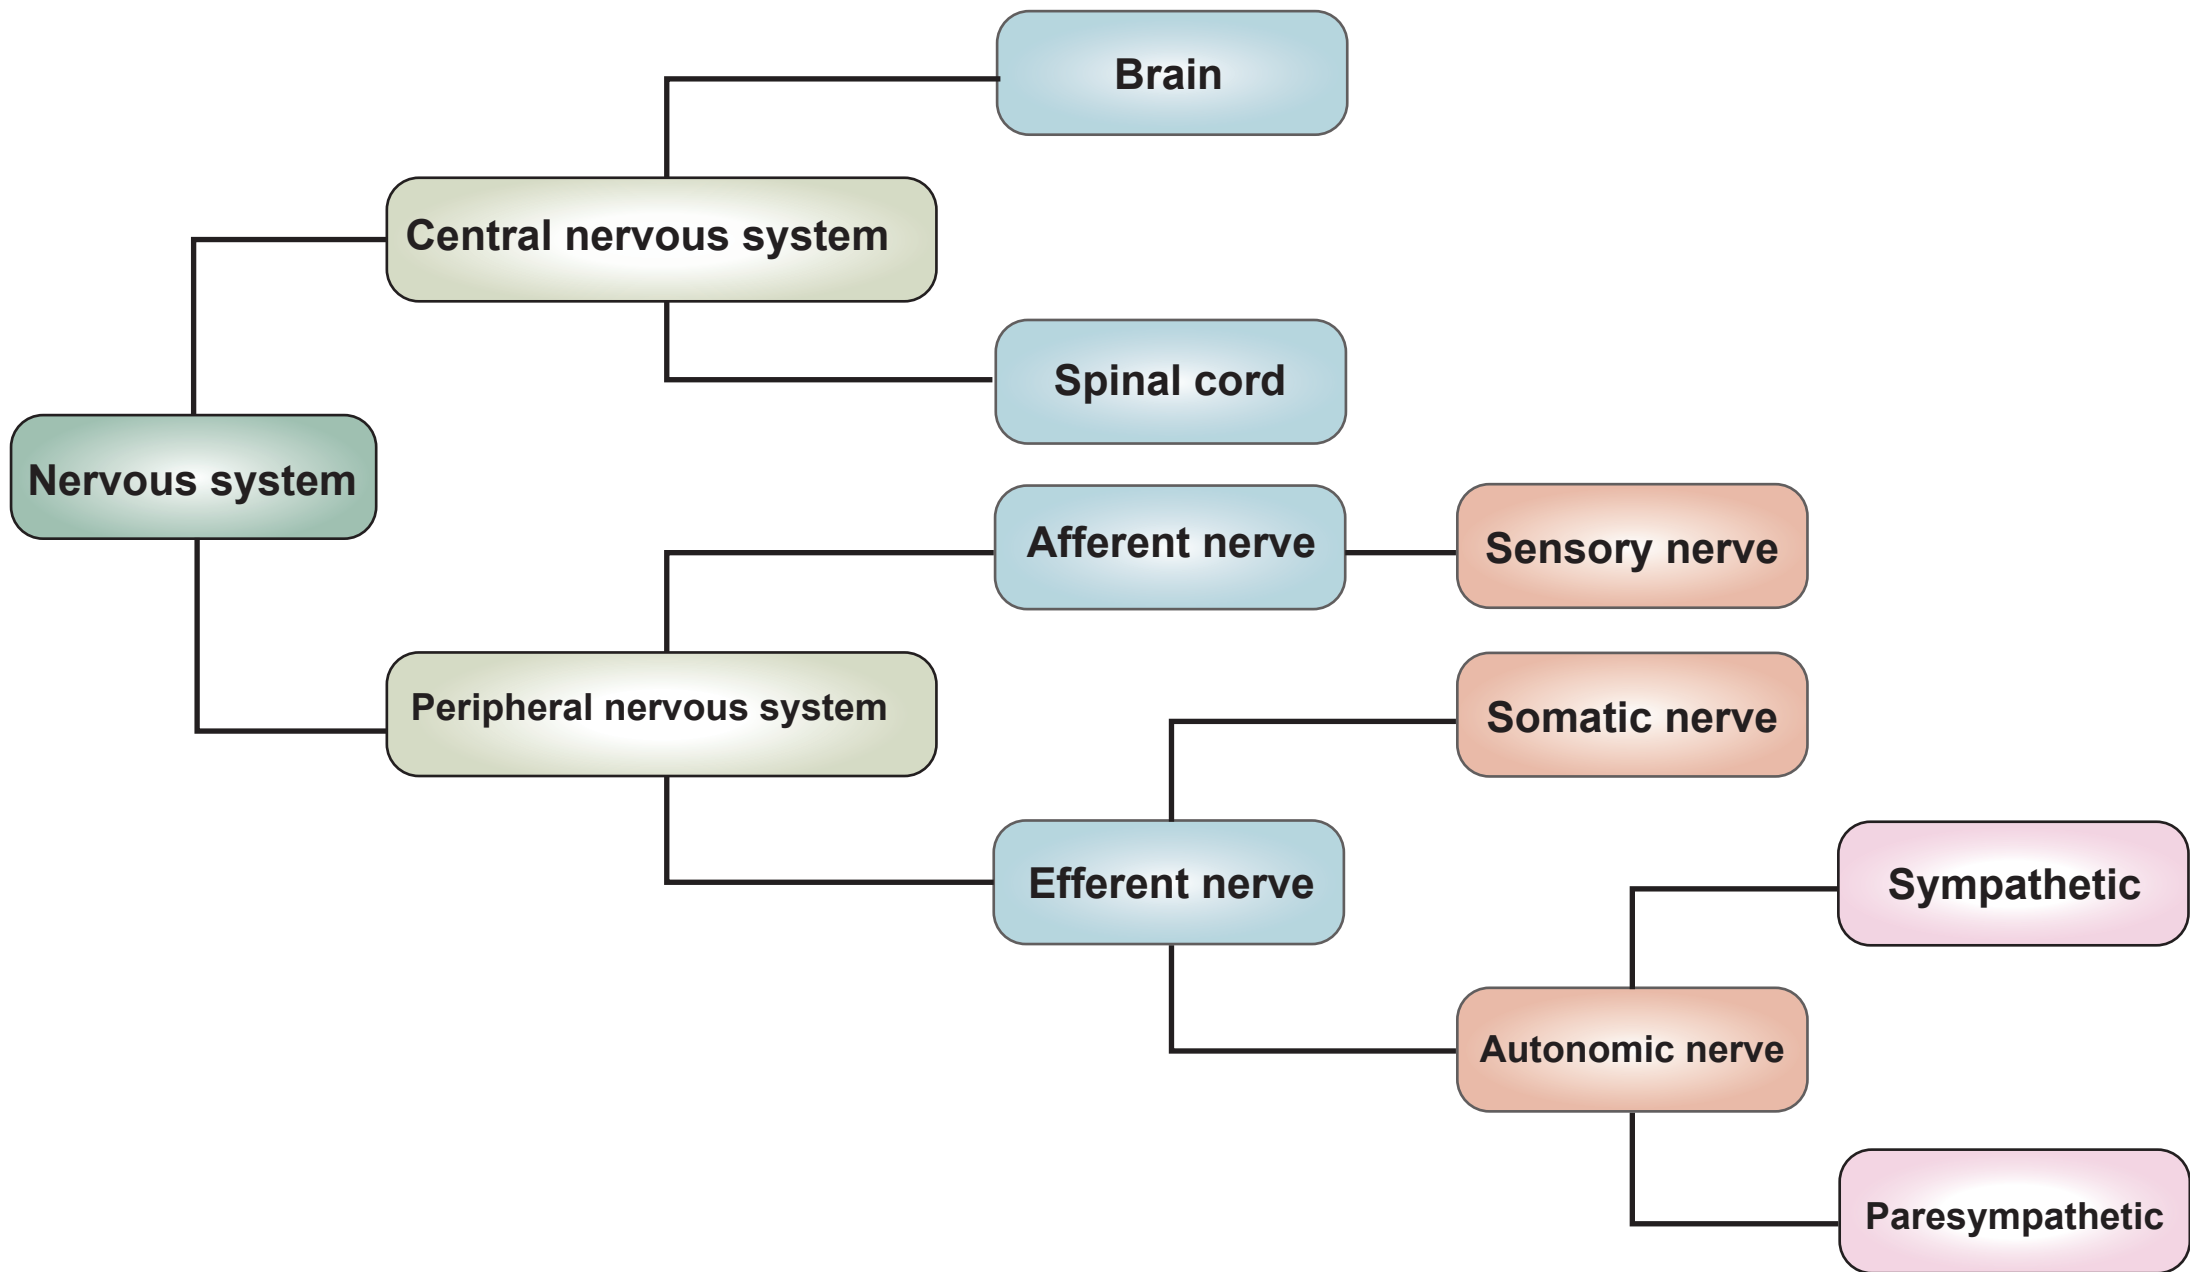

Supplement: MOESM1 [file 41413_2022_240_MOESM1_ESM.pdf]
